# Supplementary material for: Synthesis of micrometer-sized hierarchical rutile TiO2flowers and their application in dye sensitized solar cells
Source: Royal Society of Chemistry journal article supplement (doi:10.1039/c4ra05298f), 2014-01-01
Supplement: c4ra05298f1.pdf [file c4ra05298f1.pdf]

## **Synthesis of micrometer-sized hierarchical rutile TiO<sub>2</sub> flowers and their application in dye sensitized solar cells**

*Mohan Raj Subramaniam, Sriram Devanathan and Duraisamy Kumaresan<sup>\*a</sup>*

Centre of Excellence in Advanced Materials and Green Technologies, Department of Chemical Engineering and Materials Sciences, Amrita Vishwa Vidyapeetham University, Coimbatore-641112, Tamil Nadu

- S1.** SEM image of rutile TiO<sub>2</sub> flowers synthesized at 180 °C (quenched sample)
- S2.** EDS spectrum for TiO<sub>2</sub> flowers
- S3.** TEM images of nanorod clusters of TiO<sub>2</sub> flowers
- S4.** Surface roughness values of TiO<sub>2</sub> flowers thin films from optical profilometry
- S5.** Diffused reflectance spectra of samples T1, T2 and T3
- S6.** Bode plots of DSSC photoanodes of TiO<sub>2</sub> flowers prepared at 180, 210 °C and anatase TiO<sub>2</sub> nanoparticles (TNP)
- S7.** Amount of adsorbed N719 dye concentration in TiO<sub>2</sub> flowers synthesized at 180 °C, 210 °C and TNP films
- S8.** Amount of adsorbed N719 dye concentration in TiO<sub>2</sub> flowers synthesized in various cooling conditions

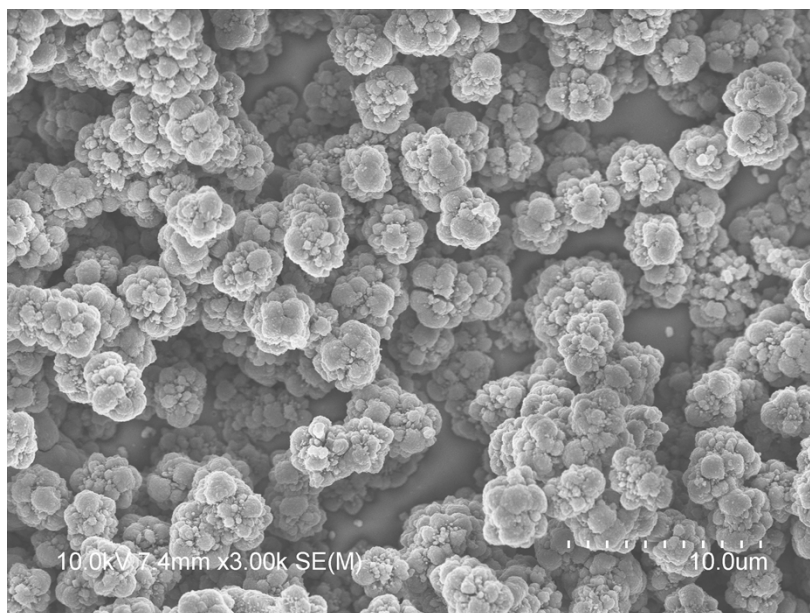

**S1.** SEM image of rutile TiO<sub>2</sub> flowers synthesized at 180°C (quenched sample)

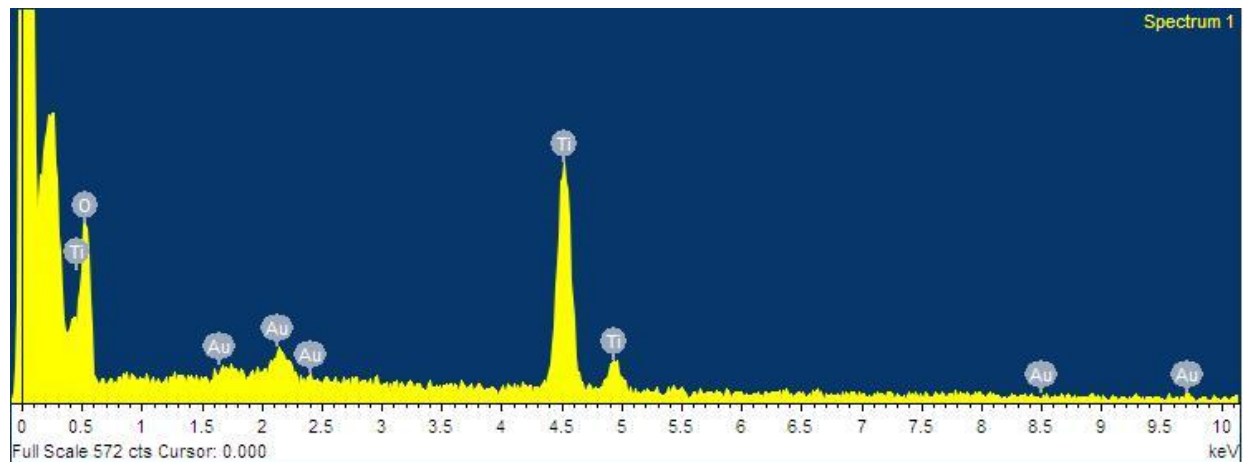

**S2.** EDS spectrum for TiO<sub>2</sub> flowers

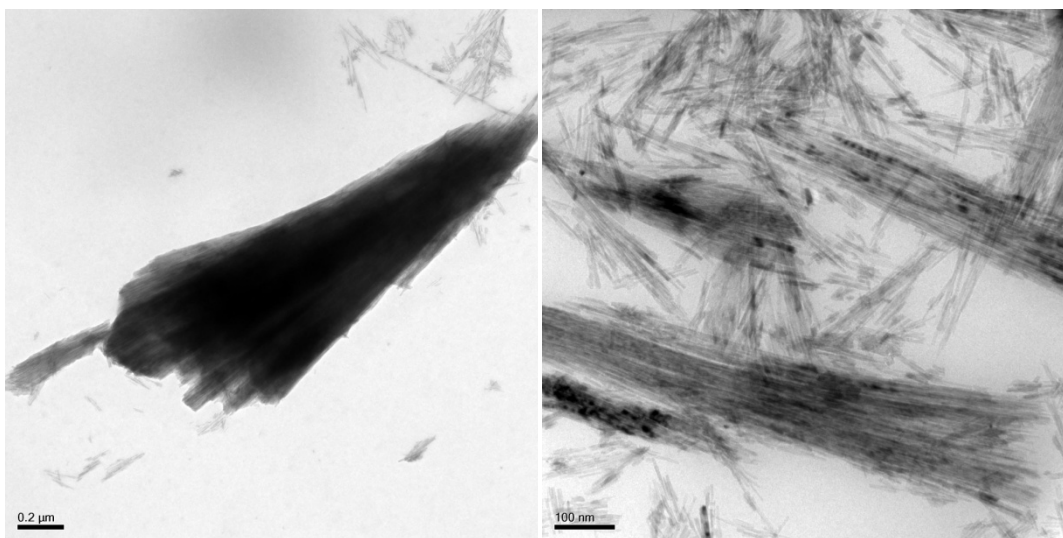

**S3.** TEM images of nanorod clusters of TiO<sub>2</sub> flowers

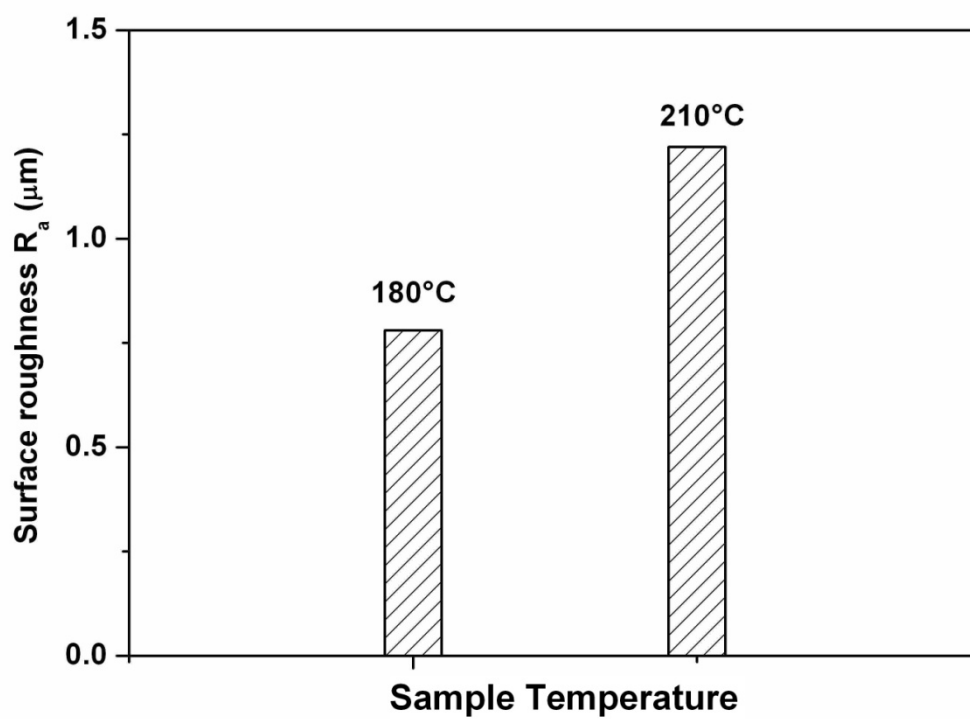

**S4.** Surface roughness values of TiO<sub>2</sub> flowers thin films from optical profilometry

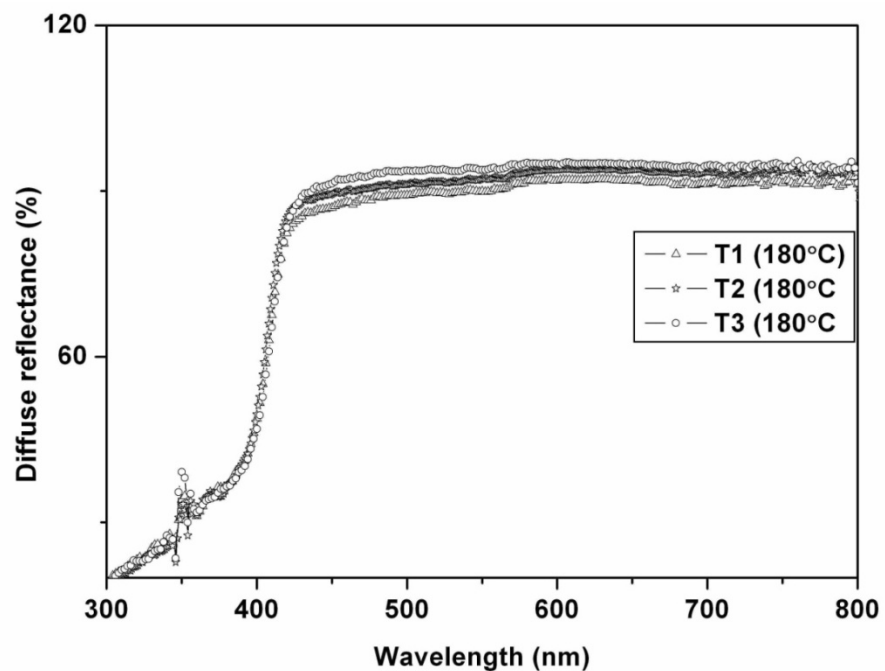

S5. Diffused reflectance spectra of samples T1, T2 and T3

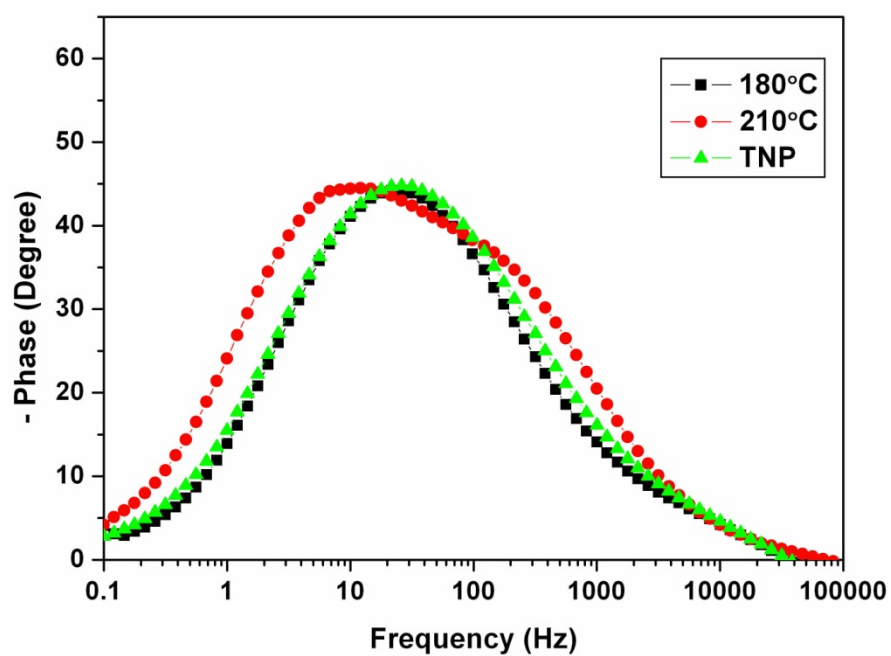

S6. Bode plots of DSSC photoanodes of  $\text{TiO}_2$  flowers prepared at 180, 210 °C and  $\text{TiO}_2$  nanoparticles (TNP)

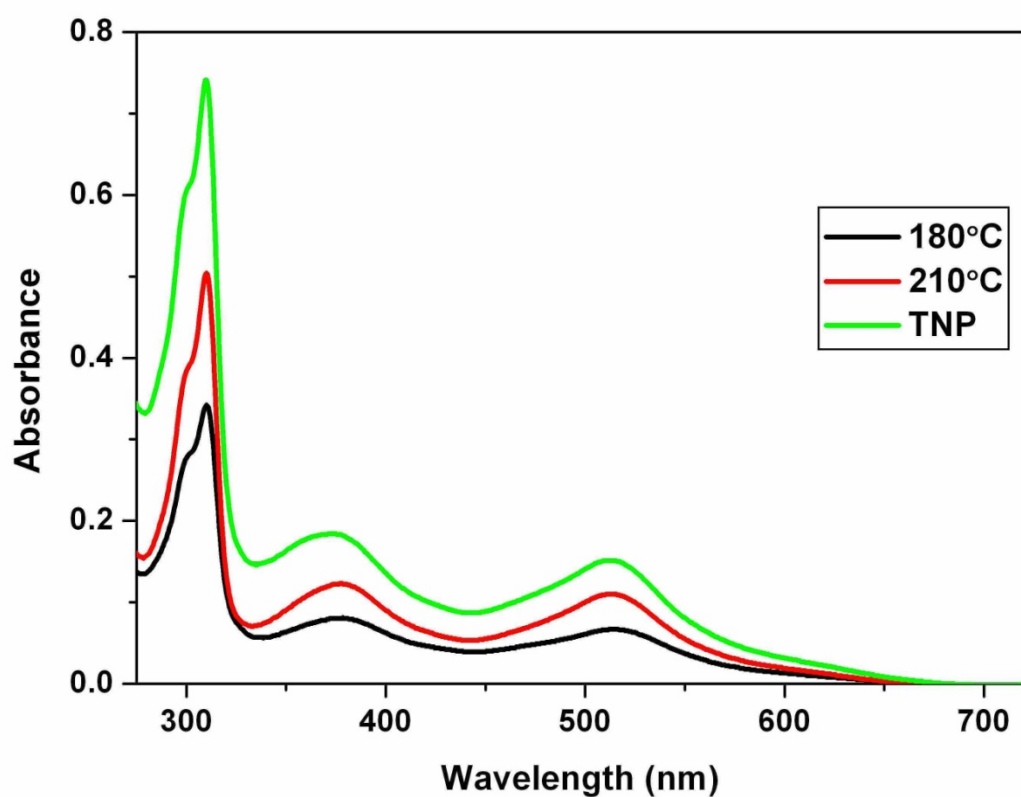

| Hydrothermal reaction temperature | $J_{sc}$ (mA/cm <sup>2</sup> ) | $V_{oc}$ (V) | FF   | $\eta$ (%) | Adsorbed N719 dye concentration (x 10 <sup>-6</sup> mol cm <sup>-2</sup> ) |
|-----------------------------------|--------------------------------|--------------|------|------------|----------------------------------------------------------------------------|
| 180°C                             | 8.14                           | 0.64         | 0.51 | 2.66       | 4.75                                                                       |
| 210°C                             | 10.04                          | 0.68         | 0.45 | 3.07       | 7.73                                                                       |
| TNP                               | 14.86                          | 0.74         | 0.60 | 6.59       | 10.4                                                                       |

**S7.** Amount of adsorbed N719 dye concentrations in TiO<sub>2</sub> flowers synthesized at 180 °C, 210 °C and TNP films

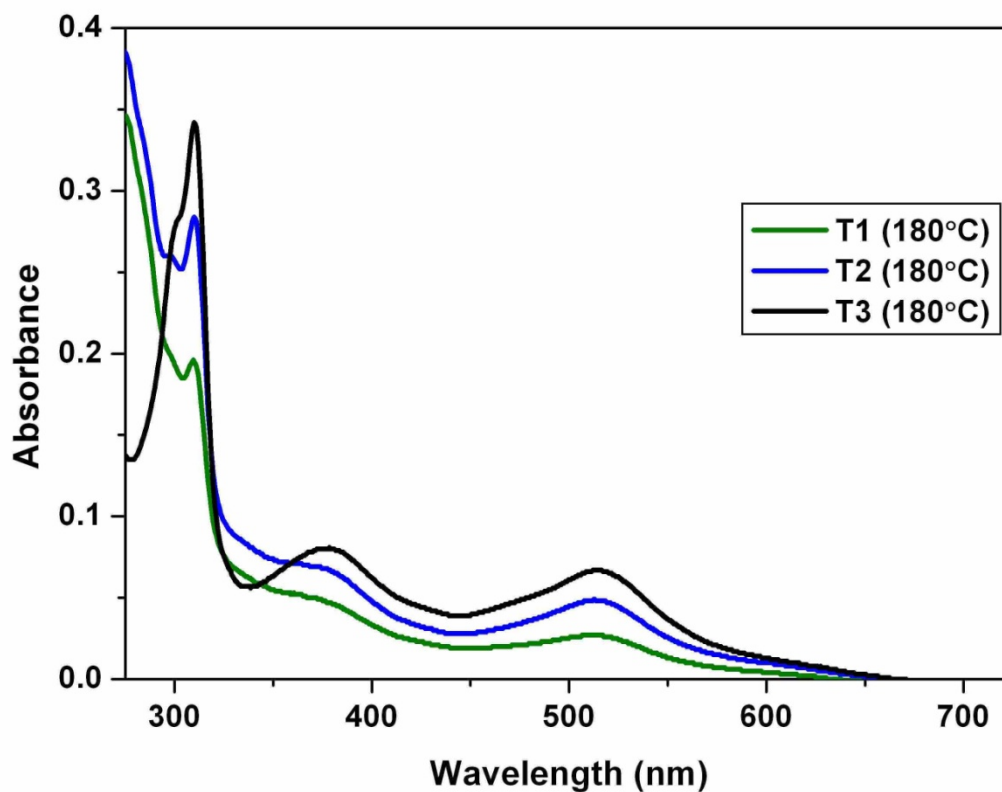

| Sample of various cooling condition | $J_{sc}$ (mA/cm <sup>2</sup> ) | $V_{oc}$ (V) | FF   | $\eta$ (%) | Adsorbed N719 dye concentration (x 10 <sup>-6</sup> mol cm <sup>-2</sup> ) |
|-------------------------------------|--------------------------------|--------------|------|------------|----------------------------------------------------------------------------|
| T1 (180°C)                          | 3.83                           | 0.58         | 0.47 | 1.05       | 1.91                                                                       |
| T2 (180°C)                          | 5.72                           | 0.61         | 0.50 | 1.76       | 3.26                                                                       |
| T3 (180°C)                          | 8.14                           | 0.64         | 0.51 | 2.65       | 4.75                                                                       |

**S8.** Amount of adsorbed N719 dye concentrations in TiO<sub>2</sub> flowers synthesized in various cooling conditions
